# Supplementary material for: Cobalt–iron zeolitic imidazolate frameworks (ZIFs) as microfibers for the effective detection of hydroquinone
Source: Royal Society of Chemistry journal article supplement (doi:10.1039/d1dt01718g), 2021-01-01
Supplement: d1dt01718g1.pdf [file d1dt01718g1.pdf]

**Supporting Information**

**Cobalt- iron Zeolitic Imidazolate Frameworks (ZIFs) as Microfibers  
for an effective Detection of Hydroquinone**

Thatchanamoorthy Thenrajan,<sup>1,‡</sup> Selvasundarsekar Sam Sankar,<sup>2,‡</sup> Girija Srinivasan,<sup>1</sup> Subrata

Kundu,<sup>2,\*</sup> Jeyaraj Wilson <sup>1,\*</sup>

<sup>1</sup>Polymer Electronics Laboratory, Department of Bioelectronics and Biosensors, Alagappa University, Karaikudi - 630 003, Tamil Nadu.

<sup>2</sup>Electrochemical Process Engineering (EPE) Division, CSIR-Central Electrochemical Research Institute (CECRI), Karaikudi-630003, Tamil Nadu.

Corresponding author E-mail ID: [skundu@cecri.res.in](mailto:skundu@cecri.res.in) (S. K) and [wilson.j2008@yahoo.com](mailto:wilson.j2008@yahoo.com) (J. W)

‡- Both authors are contributed equally.

**SI file containing 9 pages.**

**Number of Scheme: 1**

**Number of Figures: 5**

**Number of Tables: 1**

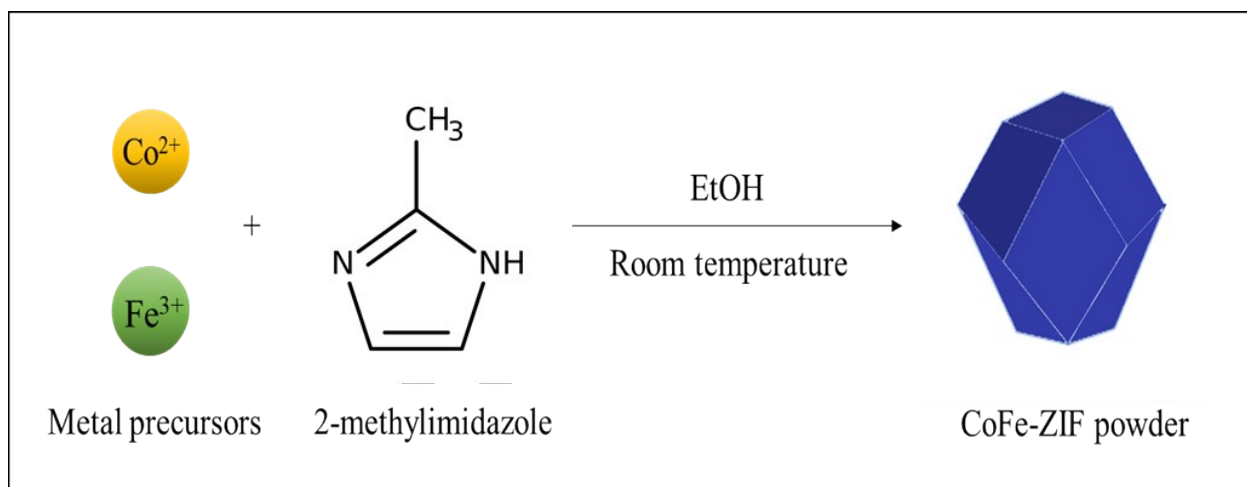

**Scheme S1.** Possible structural formation of CoFe-ZIF powder.

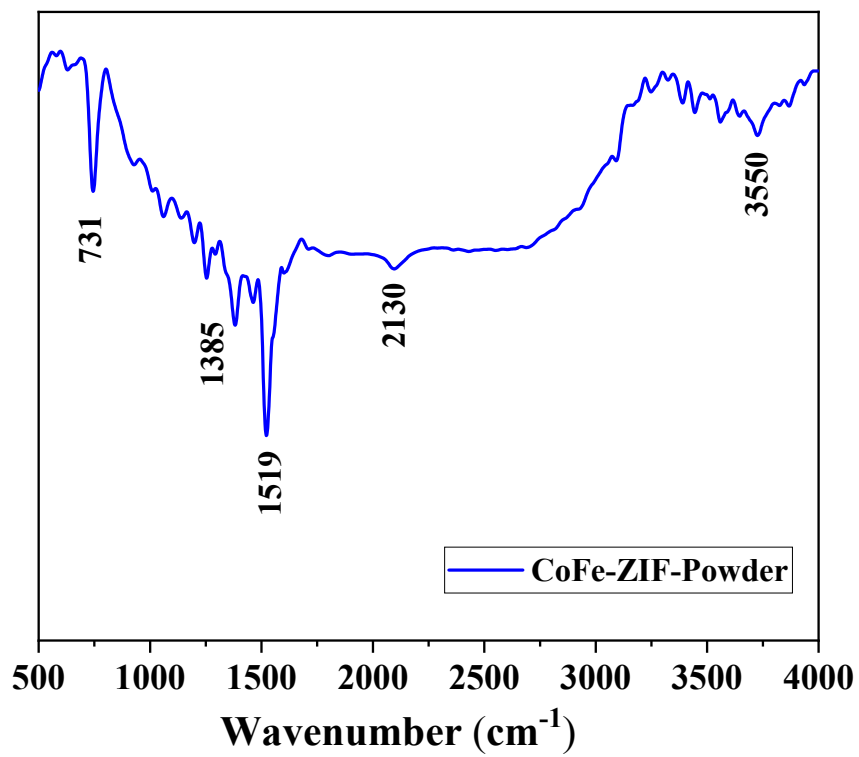

**Figure S1.** FT-IR spectrum of CoFe-ZIF-Powder.

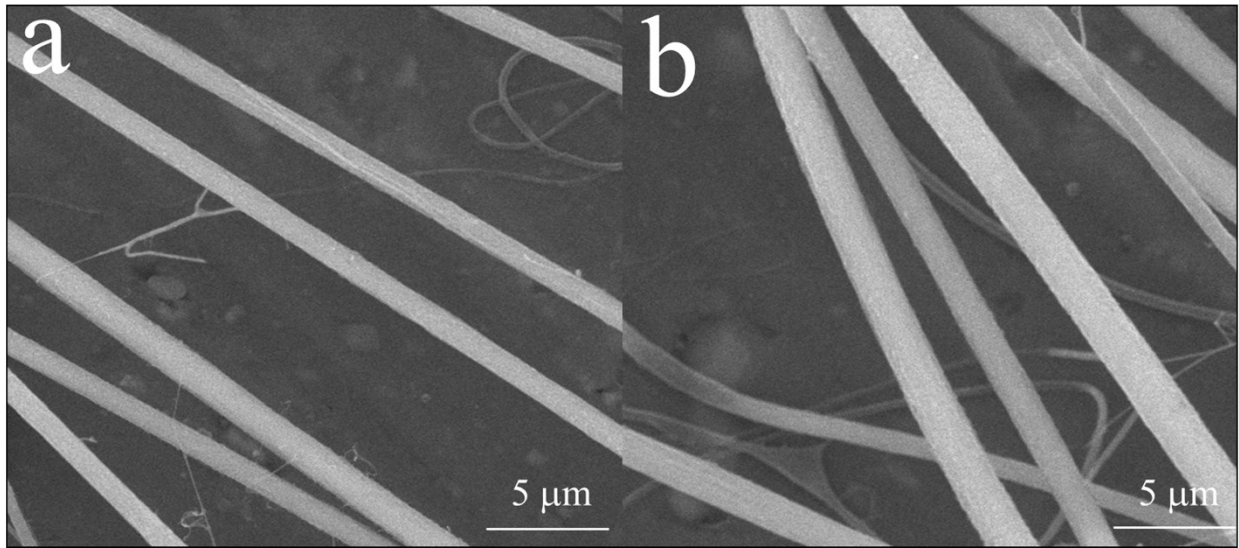

**FigureS2. (a) and (b) SEM images of the Co-ZIF microfibers.**

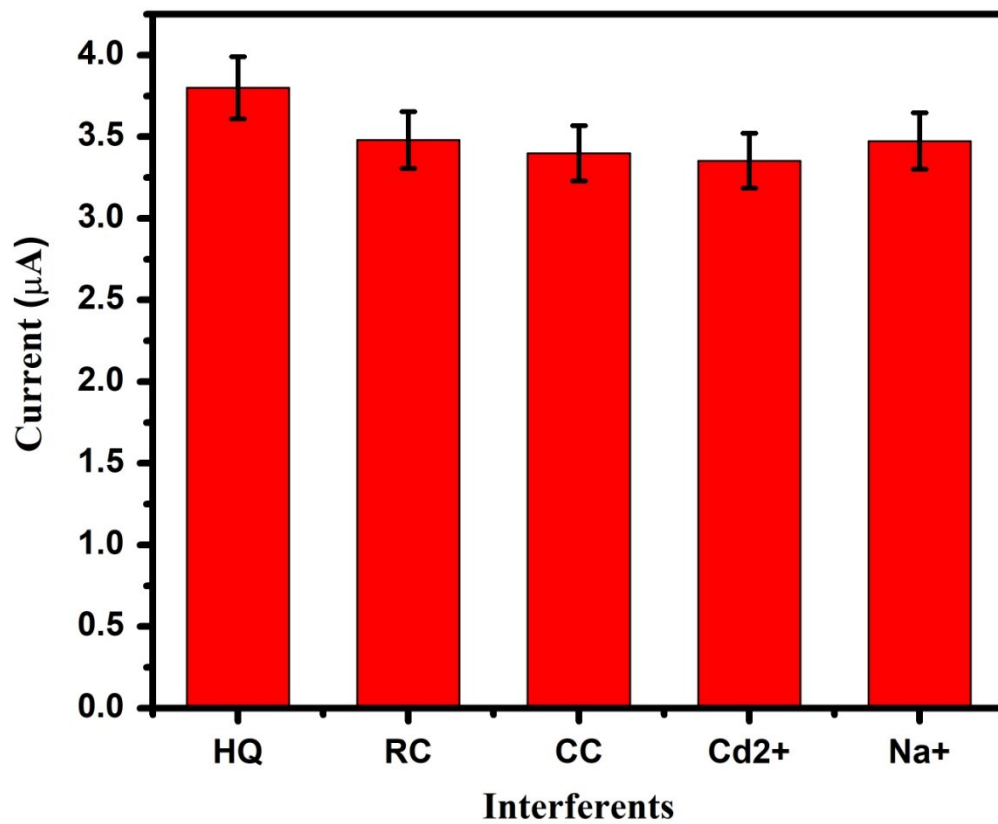

Figure S3. Interference nature of CoFe-ZIF-MFs.

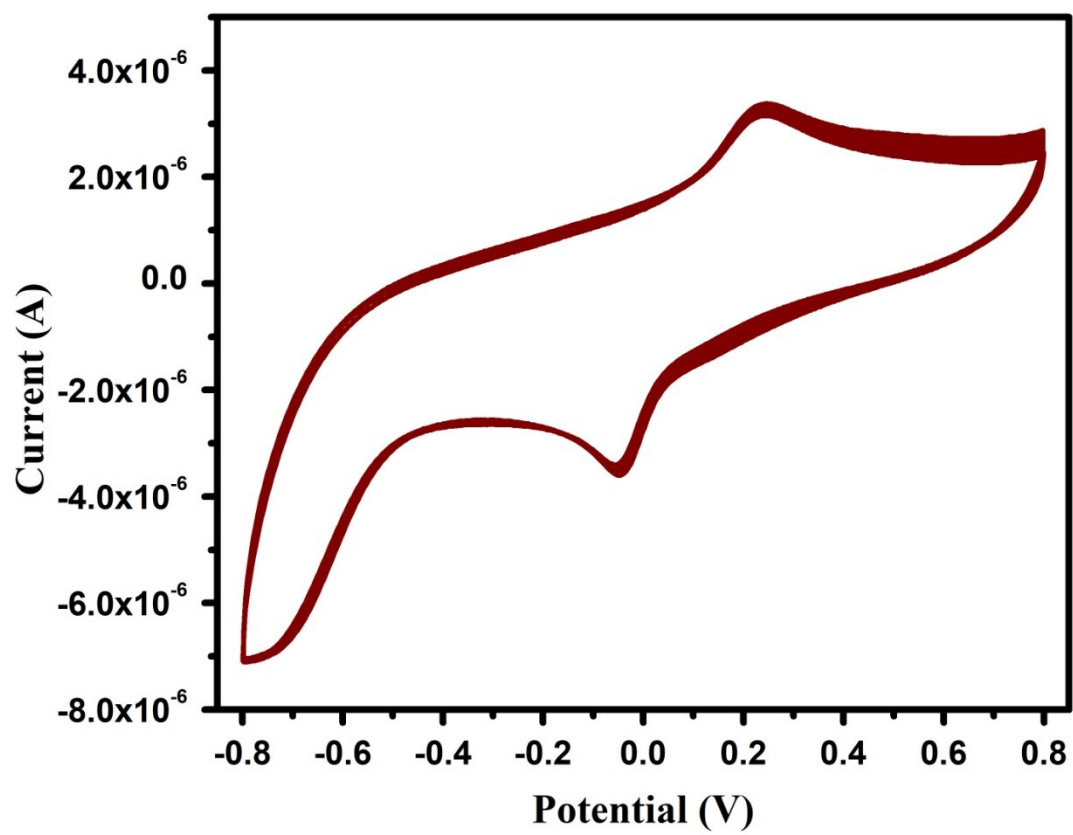

Figure S4. Stability nature of CoFe-ZIF-MFs.

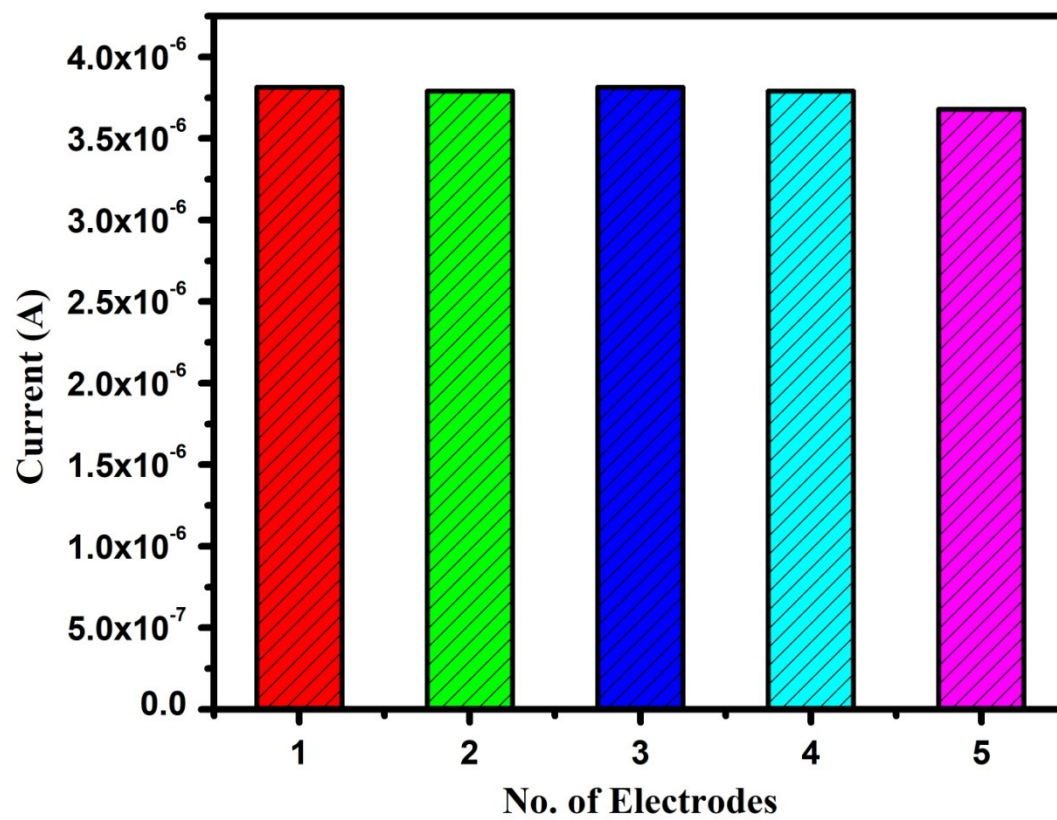

Figure S5.Reproducibility nature of CoFe-ZIF-MFs.

| Sample       | Spiked ( $\mu\text{M}$ ) | Found ( $\mu\text{M}$ ) | Recovery (%) | RSD (%) |
|--------------|--------------------------|-------------------------|--------------|---------|
| River water  | 10                       | $10.32 \pm 0.5$         | 103.2        | 4.2     |
|              | 20                       | $19.85 \pm 0.47$        | 99.2         |         |
|              | 30                       | $30.75 \pm 0.33$        | 107.5        |         |
| Lake water   | 10                       | $9.87 \pm 0.15$         | 98.7         | 1.5     |
|              | 20                       | $20.09 \pm 0.25$        | 100.4        |         |
|              | 30                       | $30.5 \pm 0.33$         | 101.6        |         |
| Ground water | 10                       | $10.14 \pm 0.1$         | 101.4        | 1.7     |
|              | 20                       | $19.65 \pm 0.5$         | 98.25        |         |
|              | 30                       | $30.25 \pm 0.44$        | 100.83       |         |

**Table S1. Real sample analysis of CoFe-ZIF-MFs on different water samples.**



### Electrochemical Surface Area (ECSA) calculation.

The Electrochemical Surface Area is used to determine the active surface area of the desired material in which the experiment is done. Here we have calculated the ECSA of the CoFe-ZIF-MFs from the CV in  $[\text{Fe}(\text{CN})_6]^{3-/4-}$  using the formula

$$i_p = 2.69 \times 10^5 \times A D^{\frac{1}{2}} \times n^{\frac{3}{2}} \times C \times V^{\frac{1}{2}}$$

Where,

- $i_p$  = maximum current value of oxidation or reduction
- $A$  = Electroactive area
- $D$  = Diffusion Co-Efficient, For  $[\text{Fe}(\text{CN})_6]^{3-/4-}$  [ $6.7 \times 10^{10} \text{ m}^2 \cdot \text{s}^{-1}$ ]
- $n$  = number of electron transferred
- $C$  = Concentration of the redox probe,  $[\text{Fe}(\text{CN})_6]^{3-/4-}$  [1mM]
- $v$  = Scan rate, [50 mV.s<sup>-1</sup>]

By substituting the relevant information, the ECSA is calculated to be **24.65 cm<sup>2</sup>**. This was significantly ten times higher than the Co-ZIF based biosensor which is previously reported <sup>1</sup>. This confirms the CoFe-ZIF-MFshas high surface area which is also responsible for enabling the effective analyte interaction producing excellent results.
